# Supplementary material for: Digital Health Intervention for Asthma: Patient-Reported Value and Usability
Source: PubMed Central journal article supplement (PMC6006012; doi:10.2196/mhealth.7362), 2018-06-04
Supplement: mhealth_v6i6e133_app2.pdf [file mhealth_v6i6e133_app2.pdf]

**Multimedia Appendix 2. Participants’ responses to the closed-ended question, “How satisfied were you with the inhaler device?,” by demographic and individual characteristics**

|                                | Estimate | Std. Error | P-value |
|--------------------------------|----------|------------|---------|
| Device Type (Smartphone)       | -70.850  | 39970      | >0.99   |
| Age < 18                       | 8.964    | 63720      | >0.99   |
| Syncing Duration               | -0.708   | 6697       | >0.99   |
| Syncing Frequency              | 0.249    | 133        | >0.99   |
| Sex (Male)                     | -75.460  | 45720      | >0.99   |
| Insurance (Public)             | -15.710  | 55980      | >0.99   |
| Initial Uncontrolled Asthma    | 34.290   | 149600     | >0.99   |
| Initial Well Controlled Asthma | -33.700  | 151700     | >0.99   |
