# Supplementary material for: Digital Health Intervention for Asthma: Patient-Reported Value and Usability
Source: PubMed Central journal article supplement (PMC6006012; doi:10.2196/mhealth.7362), 2018-06-04
Supplement: mhealth_v6i6e133_app3.pdf [file mhealth_v6i6e133_app3.pdf]

**Multimedia Appendix 3. Participants’ responses to the closed-ended question, “Overall, how satisfied were you with the reports?,” by demographic and individual characteristics**

|                                | Estimate | Std. Error | P-value |
|--------------------------------|----------|------------|---------|
| Device Type (Smartphone)       | 2.306    | 1.275      | 0.07    |
| Age < 18                       | 17.890   | 4273       | >0.99   |
| Syncing Duration               | -0.872   | 225        | >0.99   |
| Syncing Frequency              | 0.006    | 0.005      | 0.28    |
| Sex (Male)                     | 1.212    | 1.215      | 0.32    |
| Insurance (Public)             | -0.904   | 0.998      | 0.37    |
| Initial Uncontrolled Asthma    | -15.180  | 5069       | >0.99   |
| Initial Well Controlled Asthma | -15.420  | 5069       | >0.99   |
