# Supplementary material for: Digital Health Intervention for Asthma: Patient-Reported Value and Usability
Source: PubMed Central journal article supplement (PMC6006012; doi:10.2196/mhealth.7362), 2018-06-04
Supplement: mhealth_v6i6e133_app4.pdf [file mhealth_v6i6e133_app4.pdf]

**Multimedia Appendix 4. Participants’ responses to the closed-ended question, “How useful were the reports in helping you learn more about your asthma?,” by demographic and individual characteristics**

|                                | Estimate | Std. Error | P-value |
|--------------------------------|----------|------------|---------|
| Device Type (Smartphone)       | 1.666    | 0.945      | 0.08    |
| Age < 18                       | 18.510   | 4414.000   | >0.99   |
| Syncing Duration               | -0.947   | 224.200    | >0.99   |
| Syncing Frequency              | 0.002    | 0.004      | 0.60    |
| Sex (Male)                     | 0.721    | 0.896      | 0.42    |
| Insurance (Public)             | -0.560   | 0.817      | 0.49    |
| Initial Uncontrolled Asthma    | -16.440  | 5252.000   | >0.99   |
| Initial Well Controlled Asthma | -16.650  | 5252.000   | >0.99   |
