# Supplementary material for: Digital Health Intervention for Asthma: Patient-Reported Value and Usability
Source: PubMed Central journal article supplement (PMC6006012; doi:10.2196/mhealth.7362), 2018-06-04
Supplement: mhealth_v6i6e133_app5.pdf [file mhealth_v6i6e133_app5.pdf]

**Multimedia Appendix 5. Participants’ responses to the closed-ended question, “How interested would you be in continuing to track your asthma medication use with this program?,” by demographic and individual characteristics**

|                                | Estimate  | Std. Error | P-value |
|--------------------------------|-----------|------------|---------|
| Device Type (Smartphone)       | 0.204585  | 0.631053   | 0.75    |
| Age < 18                       | 0.233965  | 0.874351   | 0.79    |
| Syncing Duration               | 0.080496  | 0.044419   | 0.07    |
| Syncing Frequency              | 0.005054  | 0.002959   | 0.09    |
| Sex (Male)                     | 1.198352  | 0.665589   | 0.07    |
| Insurance (Public)             | -0.076924 | 0.670103   | 0.91    |
| Initial Uncontrolled Asthma    | -1.594618 | 1.809582   | 0.38    |
| Initial Well Controlled Asthma | -3.023383 | 1.797173   | 0.09    |
